# Supplementary material
Source: PubMed Central journal article supplement (PMC4436707)
Supplement: NIHMS681356-supplement-6.pdf [file NIHMS681356-supplement-6.pdf]

**Supplemental Figure 1.** Generation of *Ltbp4*<sup>CC>SS</sup> mice. **A.** Targeting vector used to introduce mutations in *Ltbp4* locus. Exons are

represented by open bars. The Neo cassette was inserted 373 base pairs upstream of exon 26. White and black arrowheads represent loxP and Frt sequences flanking the neo cassette, respectively. The exon (ex 26) in which the mutations were introduced is indicated by a red asterisk. **B.** Domain structure of Ltbp-4S. LTBP-4S C,C 1235, 1260 -> S,S mutations are indicated by red asterisk. **C.** Nucleotide sequence of the mutated exon 26. Cysteine codons are presented with blue letters. Mutated nucleotides are presented in red letters. The mutated BstAPI restriction site is underlined.

**Supplemental Figure 2.** Lung septation and elastogenesis are not improved in P0.5 *Tgfb1*<sup>-/-</sup>; *Ltbp4S*<sup>-/-</sup> compared to *Ltbp4S*<sup>-/-</sup> lungs. **A.** Histological analysis of WT, *Ltbp4S*<sup>-/-</sup>, *Tgfb1*<sup>-/-</sup> and *Tgfb1*<sup>-/-</sup>; *Ltbp4S*<sup>-/-</sup> lungs showed enlarged terminal air sacs in both *Ltbp4S*<sup>-/-</sup> and *Tgfb1*<sup>-/-</sup>; *Ltbp4S*<sup>-/-</sup> compared to WT and *Tgfb1*<sup>-/-</sup> lungs. **B.** Elastin staining revealed fibrillar structures in WT and *Tgfb1*<sup>-/-</sup> and globular aggregates in *Ltbp4S*<sup>-/-</sup> and *Tgfb1*<sup>-/-</sup>; *Ltbp4S*<sup>-/-</sup> lungs.

**Supplemental Figure 3.** Terminal air sac septation and elastic fiber assembly are not improved in P0.5 *Tgfb3*<sup>-/-</sup>; *Ltbp4S*<sup>-/-</sup> compared to *Ltbp4S*<sup>-/-</sup> lungs. **A.** Histological analysis of WT, *Ltbp4S*<sup>-/-</sup>, *Tgfb3*<sup>-/-</sup> and *Tgfb3*<sup>-/-</sup> *Ltbp4S*<sup>-/-</sup> P0.5 lungs revealed enlarged terminal air sacs in both *Ltbp4S*<sup>-/-</sup> and *Tgfb3*<sup>-/-</sup>; *Ltbp4S*<sup>-/-</sup> compared to WT and *Tgfb3*<sup>-/-</sup> lungs. **B.** Elastogenesis is abnormal in both *Ltbp4S*<sup>-/-</sup> and *Tgfb1*<sup>-/-</sup>; *Ltbp4S*<sup>-/-</sup> lungs, as only globular aggregates are revealed by elastin staining. In WT and *Tgfb3*<sup>-/-</sup> lungs, elastin appears fibrillar.

**Supplemental Figure 4.** *Ltbp4*<sup>CC>SS</sup> is synthesized and secreted by primary lung fibroblasts. Western blot analysis of conditioned medium

1  
2  
3 from WT and *Ltbp4*<sup>CC>SS</sup> primary lung fibroblasts with an antibody  
4 against Ltbp-4 showed that Ltbp-4 and Ltbp-4<sup>CC>SS</sup> are secreted from  
5 WT and *Ltbp4*<sup>CC>SS</sup> cells respectively in approximately similar amounts  
6 and have the same molecular mass. Western blotting with an  $\beta$  actin  
7 antibody was used as a loading control. Horizontal bars indicate position  
8 of molecular weight marker bands in kDa.  
9  
10  
11  
12  
13  
14  
15
