# Supplementary material
Source: PubMed Central journal article supplement (PMC4436707)
Supplement: NIHMS681356-supplement-Table_1.pdf [file NIHMS681356-supplement-Table_1.pdf]

## Supplemental Table 1

### A. Primers used for Q-PCR reactions:

|              |                        |
|--------------|------------------------|
| mtgfb1Fwd    | GCTGAACCAAGGAGACGGAA   |
| mtgfb1Rev    | ATGTCATGGATGGTGCCCAG   |
| mtgfb2Fwd    | ATAATTGCTGCCTTCGCCCT   |
| mtgfb2rev    | GGCTGAGGACTTTGGTGTGT   |
| mtgfb3Fw:    | CCAATTACTGCTTCCGCAACC  |
| mtgfb3Rev:   | CTCTGGGTTTCAGGGTGTGT   |
| mLTBP1FW:    | ACTTCATCCAGGATCGCTTTC  |
| mLTBP1REV:   | CGCTGCATTCATTTACATCGAC |
| mLtp2Fwd:    | AATTCAGTCAGCTCTGCCCC   |
| mLtp2Rev:    | GCATTCGTTGTGATCCTGGC   |
| mLTBP3FW:    | GGCCTGTCGTGATGTCAACG   |
| mLTBP3REV:   | CACTTTCCCAGCCTCACACT   |
| mltp4Fwd:    | TCTTACCACTGTACCTGCGAG  |
| mltp4Rev:    | CAAAGTCATCTGAGTCCTGGG  |
| mfibuln3Fwd: | ACCCACGAAACCCATGTCAA   |
| mfibuln3Rev: | TCACAGGGCTTGTTTGTGCGTA |
| mfibuln4Fw:  | GGCTCTGCCAAGATATTGACG  |
| mfibuln4Rev: | TGTAGCGGTGCACAATGGAT   |
| mfibuln5Fwd: | TGTGTGGATGTGGACGAGTG   |
| mfibuln5Rev: | CCATCGTCGTTGAGGGTGAA   |

### B. Primers used to clone cDNA plasmids to make standards to quantify RNA copy numbers

|                |                       |
|----------------|-----------------------|
| mtgfb1ctFwd:   | CTGCTGACCCCCACTGATAC  |
| mtgfb1ctRev:   | GTGAGCTGTGCAGGTGCTG   |
| mtgfb2ctfwd    | CTGCTAATGTTGTTGCCCTCC |
| mtgfb2ctRev:   | TGGTTCAGATCCTGGGAC    |
| mtgfb3ctFwd:   | AGGATCACCACAACCCACAC  |
| mtgfb3ctRev:   | ACTTACACGACTTCACCACC  |
| Mltp1ctFwd:    | TATGGCCCAGAAACAGACCC  |
| Mltp1ctrev:    | CAGGCTACATACCATCCGAC  |
| Mltp2ctFwd:    | ATGGTGGTCCCTCCCTGCTC  |
| Mltp2ctRev     | CACACACTCACCGTTCTCAC  |
| MLTBP3CTFW:    | TAGCACCTGCCCTGATGGC   |
| MLTBP3CTREV:   | CAATGTCCTCACAGCGGCTC  |
| Mltp4ctFwd:    | ATGACGAATGTGCGGACGAG  |
| Mltp4ctRev:    | ATAGGGAATTCCAAAGCCACC |
| Mfibuln3ctFwd: | TATGTGCCACAGGGTTACG   |
| Mfibuln3ctRev: | GCTTGTGCGGAAGGTTCTTA  |
| Mfibuln4ctFw:  | GATGGCTTCTCCTGCAGCG   |
| Mfibuln4ctRev: | CCAGAACGGATCTGAAAGGC  |
| Mfibuln5ctFwd: | TTGTCTGCCGCTTTGGGTAT  |

Mfibuln5ctRev: AACTCGGAGAAGCTGCACTC
